# Supplementary material for: Different Types of Peptide Detected by Mass Spectrometry among Fresh Silk and Archaeological Silk Remains for Distinguishing Modern Contamination
Source: PubMed Central journal article supplement (PMC4505881; doi:10.1371/journal.pone.0132827), 2015-07-17
Supplement: pone.0132827.s005.pdf [file pone.0132827.s005.pdf]

**S1 Table The detected peptide sequences of silk protein of fresh silk**

| <b>Sequence</b>                | <b>Protein Description</b>                     | <b>Protein Accessions</b> | <b>ΔScore</b> | <b>Charge</b> | <b>m/z [Da]</b> | <b>MH+ [Da]</b> | <b>ΔM [ppm]</b> |
|--------------------------------|------------------------------------------------|---------------------------|---------------|---------------|-----------------|-----------------|-----------------|
| GAGAGSGAASGAGAGAGAGAGTGSSGFGPY | fibroin heavy chain precursor<br>[Bombyx mori] | gi164448672               | 1             | 2             | 1128.49670      | 2255.98613      | -2.31           |
| GAGAGSGAASGAGAGAGAGTGS SGFGPY  | fibroin heavy chain precursor<br>[Bombyx mori] | gi164448672               | 1             | 2             | 1064.46729      | 2127.92729      | -2.56           |
| GQGAGSAASSVSSASSRSY            | fibroin heavy chain precursor<br>[Bombyx mori] | gi164448672               | 1             | 2             | 858.89258       | 1716.77788      | -0.31           |
| GIGVGAGYGAGAGVGY               | fibroin heavy chain precursor<br>[Bombyx mori] | gi164448672               | 1             | 2             | 663.32599       | 1325.64470      | -2.87           |
| MKTLSDGTVAQSY                  | fibroin heavy chain precursor<br>[Bombyx mori] | gi164448672               | 1             | 2             | 700.83984       | 1400.67241      | -0.18           |
| GVGAGAGYGAGY                   | fibroin heavy chain precursor<br>[Bombyx mori] | gi164448672               | 0.1           | 2             | 500.22931       | 999.45134       | -1.74           |
| EYAWSESDF                      | fibroin heavy chain precursor<br>[Bombyx mori] | gi164448672               | 1             | 2             | 610.73907       | 1220.47087      | -2.78           |
| GAGAGAGY                       | fibroin heavy chain precursor<br>[Bombyx mori] | gi164448672               | 0.33          | 1             | 623.27704       | 623.27704       | -2.19           |
| GAGVGAGY                       | fibroin heavy chain precursor<br>[Bombyx mori] | gi164448672               | 0.17          | 1             | 651.30835       | 651.30835       | -2.08           |
| GAGVGAGYGAGAGSGAAF             | fibroin heavy chain precursor<br>[Bombyx mori] | gi164448672               | 1             | 2             | 699.32434       | 1397.64141      | -2.22           |
| VANGGYSRSDGY                   | fibroin heavy chain precursor<br>[Bombyx mori] | gi164448672               | 1             | 2             | 623.27722       | 1245.54717      | -1.87           |

|                        |                                      |            |   |   |           |            |       |
|------------------------|--------------------------------------|------------|---|---|-----------|------------|-------|
| NVQEILKDMASQGDY        | fibroin light chain<br>[Bombyx mori] | gi24637964 | 1 | 2 | 855.90198 | 171079668  | -1.47 |
| SDNEIPRDIDDGKASSVISRAW | fibroin light chain<br>[Bombyx mori] | gi24637964 | 1 | 3 | 811.06549 | 2431.18192 | -1.24 |
| IAQAASQVHV             | fibroin light chain<br>[Bombyx mori] | gi24637964 | 1 | 2 | 512.28156 | 1023.55583 | -2.32 |
| DYVDDTDKSIAIL          | fibroin light chain<br>[Bombyx mori] | gi24637964 | 1 | 2 | 734.36285 | 1467.71843 | -2.02 |
| VINPGQLRY              | fibroin light chain<br>[Bombyx mori] | gi24637964 | 1 | 2 | 530.29956 | 1059.59184 | -2.59 |
| TDGVRSNGNFAGF          | fibroin light chain<br>[Bombyx mori] | gi24637964 | 1 | 2 | 614.28967 | 1227.57207 | -2.67 |
| FGHVGQNL               | fibroin light chain<br>[Bombyx mori] | gi24637964 | 1 | 2 | 436.22403 | 871.44078  | -1.52 |
| DFEAAW                 | fibroin light chain<br>[Bombyx mori] | gi24637964 | 1 | 1 | 738.30804 | 738.30804  | -1.80 |
| RQSLGPF                | fibroin light chain<br>[Bombyx mori] | gi24637964 | 1 | 2 | 402.72095 | 804.43462  | -2.09 |
| RQSLGPF                | fibroin light chain<br>[Bombyx mori] | gi24637964 | 1 | 2 | 476.25504 | 951.50279  | -2.03 |
| VINPGQL                | fibroin light chain<br>[Bombyx mori] | gi24637964 | 1 | 1 | 740.42865 | 740.42865  | -2.03 |
| HQSAGSITDLL            | fibroin light chain<br>[Bombyx mori] | gi24637964 | 1 | 2 | 571.29456 | 1141.58183 | -2.62 |
