# Supplementary material for: Different Types of Peptide Detected by Mass Spectrometry among Fresh Silk and Archaeological Silk Remains for Distinguishing Modern Contamination
Source: PubMed Central journal article supplement (PMC4505881; doi:10.1371/journal.pone.0132827), 2015-07-17
Supplement: pone.0132827.s006.pdf [file pone.0132827.s006.pdf]

**S2 Table The detected peptide sequences of silk protein of YN**

| <b>Sequence</b>                    | <b>Protein Description</b>                     | <b>Protein Accessions</b> | <b><math>\Delta</math>Score</b> | <b>charge</b> | <b>m/z [Da]</b> | <b>MH+ [Da]</b> | <b><math>\Delta</math>M [ppm]</b> |
|------------------------------------|------------------------------------------------|---------------------------|---------------------------------|---------------|-----------------|-----------------|-----------------------------------|
| GAGAGSGAASGAGAGAGA<br>GAGTGSSGFGPY | fibroin heavy chain precursor<br>[Bombyx mori] | gi164448672               | 1.00                            | 2             | 1128.49805      | 2255.98882      | -1.12                             |
| GAGAGSGAASGAGAGAGA<br>GAGTGSSGF    | fibroin heavy chain precursor<br>[Bombyx mori] | gi164448672               | 1.00                            | 2             | 969.92847       | 1938.84966      | -2.13                             |
| GQGAGSAASSVSSASSRSY                | fibroin heavy chain precursor<br>[Bombyx mori] | gi164448672               | 1.00                            | 2             | 858.89233       | 1716.77739      | -0.59                             |
| GAASGTGAGYGAGAGAGY                 | fibroin heavy chain precursor<br>[Bombyx mori] | gi164448672               | 1.00                            | 2             | 708.31250       | 1415.61772      | -0.67                             |
| GAGAGSGAGSGAGAGSGA<br>GAGY         | fibroin heavy chain precursor<br>[Bombyx mori] | gi164448672               | 1.00                            | 2             | 784.33936       | 1567.67143      | -1.17                             |
| VAADAGAYSQSGPY                     | fibroin heavy chain precursor<br>[Bombyx mori] | gi164448672               | 1.00                            | 2             | 678.80634       | 1356.60539      | -0.95                             |
| GAGAGAGYGAGAGAGY                   | fibroin heavy chain precursor<br>[Bombyx mori] | gi164448672               | 0.73                            | 2             | 614.27203       | 1227.53679      | -1.77                             |
| GAGYGAGVGAGY                       | fibroin heavy chain precursor<br>[Bombyx mori] | gi164448672               | 0.10                            | 2             | 500.22882       | 999.45036       | -2.72                             |
| GAGVGAGYGVGY                       | fibroin heavy chain precursor<br>[Bombyx mori] | gi164448672               | 0.42                            | 2             | 514.24500       | 1027.48271      | -1.62                             |
| GAGAGAGY                           | fibroin heavy chain precursor<br>[Bombyx mori] | gi164448672               | 0.26                            | 1             | 623.27979       | 623.27979       | 2.22                              |
| GAGVGAGY                           | fibroin heavy chain precursor<br>[Bombyx mori] | gi164448672               | 0.22                            | 1             | 651.30865       | 651.30865       | -1.61                             |

|               |                                      |            |   |   |           |            |       |
|---------------|--------------------------------------|------------|---|---|-----------|------------|-------|
| IAQAASQVHV    | fibroin light chain<br>[Bombyx mori] | gi24637964 | 1 | 2 | 512.28156 | 1023.55583 | -2.32 |
| RQSLGPF       | fibroin light chain<br>[Bombyx mori] | gi24637964 | 1 | 2 | 402.72095 | 80443462   | -2.09 |
| DYVDDTDKSIAIL | fibroin light chain<br>[Bombyx mori] | gi24637964 | 1 | 2 | 734.36340 | 1467.71953 | -1.27 |
| VINPGQL       | fibroin light chain<br>[Bombyx mori] | gi24637964 | 1 | 1 | 740.42957 | 740.42957  | -0.79 |
| NLINQL        | fibroin light chain<br>[Bombyx mori] | gi24637964 | 1 | 1 | 714.41345 | 714.41345  | -1.45 |
| DFEAAWDAIL    | fibroin light chain<br>[Bombyx mori] | gi24637964 | 1 | 2 | 575.77307 | 1150.53887 | -2.36 |
| DFEAAW        | fibroin light chain<br>[Bombyx mori] | gi24637964 | 1 | 1 | 738.30823 | 738.30823  | -1.55 |
| NVQEIL        | fibroin light chain<br>[Bombyx mori] | gi24637964 | 1 | 2 | 358.20251 | 715.39775  | -1.06 |
