# Supplementary material for: Different Types of Peptide Detected by Mass Spectrometry among Fresh Silk and Archaeological Silk Remains for Distinguishing Modern Contamination
Source: PubMed Central journal article supplement (PMC4505881; doi:10.1371/journal.pone.0132827), 2015-07-17
Supplement: pone.0132827.s007.pdf [file pone.0132827.s007.pdf]

**S3 Table The detected peptide sequences of silk protein of LA**

| <b>Sequence</b>                    | <b>Protein Description</b>                     | <b>Protein Accessions</b> | <b><math>\Delta</math>Score</b> | <b>Charge</b> | <b>m/z [Da]</b> | <b>MH+ [Da]</b> | <b><math>\Delta</math>M [ppm]</b> |
|------------------------------------|------------------------------------------------|---------------------------|---------------------------------|---------------|-----------------|-----------------|-----------------------------------|
| GIGVGAGYGAGAGVGY                   | fibroin heavy chain precursor<br>[Bombyx mori] | gi164448672               | 1                               | 2             | 663.32629       | 1325.64531      | -2.41                             |
| VITTDSDGNESIVEEDVLMK<br>TL         | fibroin heavy chain precursor<br>[Bombyx mori] | gi164448672               | 0.85                            | 2             | 1212.58545      | 2424.16362      | -2.60                             |
| GAGAGSGAASGAGAGAGA<br>GAGTGSSGFGPY | fibroin heavy chain precursor<br>[Bombyx mori] | gi164448672               | 0.8                             | 3             | 752.66638       | 2255.98459      | -2.99                             |
| EYAWSESDF                          | fibroin heavy chain precursor<br>[Bombyx mori] | gi164448672               | 1                               | 2             | 610.73944       | 1220.47161      | -2.18                             |
| GAGAGAGY                           | fibroin heavy chain precursor<br>[Bombyx mori] | gi164448672               | 0.25                            | 1             | 623.27673       | 623.27673       | -2.68                             |
| GAGVGAGY                           | fibroin heavy chain precursor<br>[Bombyx mori] | gi164448672               | 0.15                            | 1             | 651.30841       | 651.30841       | -1.98                             |
