# Supplementary material for: Different Types of Peptide Detected by Mass Spectrometry among Fresh Silk and Archaeological Silk Remains for Distinguishing Modern Contamination
Source: PubMed Central journal article supplement (PMC4505881; doi:10.1371/journal.pone.0132827), 2015-07-17
Supplement: pone.0132827.s008.pdf [file pone.0132827.s008.pdf]

**S4 Table The detected peptide sequences of silk protein in HS**

| <b>Sequence</b>                 | <b>Protein Description</b>                     | <b>Protein Accessions</b> | <b><math>\Delta</math> Score</b> | <b>Charge</b> | <b>m/z [Da]</b> | <b>MH+ [Da]</b> | <b><math>\Delta</math>M [ppm]</b> |
|---------------------------------|------------------------------------------------|---------------------------|----------------------------------|---------------|-----------------|-----------------|-----------------------------------|
| GAGAGSGAASGAGAGA<br>GAGAGTGSSGF | fibroin heavy chain precursor<br>[Bombyx mori] | gi164448672               | 1                                | 2             | 969.92999       | 1938.8527       | -0.55                             |
| GAGAGSGAGSGAGAGS<br>GAGAGY      | fibroin heavy chain precursor<br>[Bombyx mori] | gi164448672               | 1                                | 2             | 784.34033       | 1567.6734       | 0.08                              |
| GAGAGAGY                        | fibroin heavy chain precursor<br>[Bombyx mori] | gi164448672               | 0.21                             | 1             | 623.27832       | 623.27832       | -0.13                             |
| GAGVGAGY                        | fibroin heavy chain precursor<br>[Bombyx mori] | gi164448672               | 0.15                             | 1             | 651.30951       | 651.30951       | -0.29                             |
